# Supplementary material for: The second Southern African Bird Atlas Project: Causes and consequences of geographical sampling bias
Source: PubMed Central journal article supplement (PMC5587490; doi:10.1002/ece3.3228), 2017-07-27
Supplement: ECE3-7-6839-s002.pdf [file ECE3-7-6839-s002.pdf]

**Table S1** Details for each province: total number of lists (i.e. surveys), town or city closest to pentads with exceptionally high sampling effort ('sampling hubs'), proportion of pentads with access to major roads, mean and standard deviation of percentage cover per pentad of natural, urban, cultivated, and protected area, mean and standard deviation of annual precipitation, summer temperature and winter temperature.

| Province      | Total number of lists | Town or city closest to sampling hubs            | Major Roads | Natural area (%) | Urban area (%) | Cultivated area (%) | Protected area | Mean annual precipitation | Mean summer temperature | Mean winter temperature |
|---------------|-----------------------|--------------------------------------------------|-------------|------------------|----------------|---------------------|----------------|---------------------------|-------------------------|-------------------------|
| Gauteng4D     | 24167                 | Johannesburg, Pretoria (Rietvlei Nature Reserve) | 0.686       | 56.73±23.07      | 7.91±13.49     | 28.78±20.84         | 5.32±16.27     | 639.7±5.32                | 27.93±1.54              | 1.10±1.09               |
| Mpumalanga    | 10261                 | Middelburg, Nelspruit                            | 0.485       | 64.53±25.83      | 2.11±5.79      | 17.30±19.92         | 17.46±34.80    | 736.44±169.72             | 26.52±2.63              | 3.72±2.98               |
| Limpopo       | 11447                 | Modimolle                                        | 0.293       | 72.85±29.79      | 3.33±6.74      | 14.41±18.10         | 16.08±33.42    | 528.23±145.15             | 29.88±1.92              | 5.15±2.19               |
| North West    | 4377                  | Klerksdorp                                       | 0.366       | 63.73±29.93      | 1.94±5.67      | 25.37±29.26         | 1.72±9.87      | 458.44±92.43              | 31.93±1.59              | 0.42±0.59               |
| Free State    | 8052                  | Bloemfontein, Betlehem                           | 0.457       | 63.69±26.65      | 0.73±3.91      | 32.26±26.65         | 1.70±9.23      | 532.98±125.79             | 28.64±2.13              | 0.03±0.45               |
| KwaZulu-Natal | 19007                 | Durban, Richards Bay                             | 0.357       | 62.58±25.09      | 4.93±8.76      | 15.24±16.97         | 8.34±22.87     | 848.69±153.49             | 26.80±2.49              | 5.45±3.64               |
| Eastern Cape  | 12471                 | Port Elizabeth, East London, Lady Grey           | 0.43        | 80.80±23.64      | 2.25±6.07      | 11.08±16.26         | 6.06±17.26     | 552.06±233.62             | 27.34±2.26              | 3.24±3                  |
| Western Cape  | 22970                 | Cape Town, Velddrif, Wilderness                  | 0.398       | 78.71±29.77      | 1.42±7.75      | 17.31±27.07         | 13.88±26.36    | 348.35±227.13             | 28.82±2.18              | 4.15±2.14               |
| Northern Cape | 7269                  | Lime Acres, Port Nolloth                         | 0.269       | 95.91±9.94       | 0.13±1.12      | 0.92±4.07           | 4.96±20.46     | 203.55±88.88              | 31.57±1.48              | 1.92±1.74               |
