# Supplementary material for: The second Southern African Bird Atlas Project: Causes and consequences of geographical sampling bias
Source: PubMed Central journal article supplement (PMC5587490; doi:10.1002/ece3.3228), 2017-07-27
Supplement: ECE3-7-6839-s003.pdf [file ECE3-7-6839-s003.pdf]

**Table S2** Variance Inflation Factors (VIF) for each predictor variable in each province, indicating collinearity between each predictor and all other predictors. A common rule of thumb about (VIF) states that values of 10 or more indicate serious collinearity, although this threshold is dependent on, e.g., sample size (O'Brien, 2007). Consequently, we decided that collinearity among predictors are acceptable and we included all predictors in the regression for each province.

|               | Distance to hub (log) | Distance to road | Protected area | Urban area | Cultivated area | Mean annual precipitation | Mean summer temperature | Mean winter temperature |
|---------------|-----------------------|------------------|----------------|------------|-----------------|---------------------------|-------------------------|-------------------------|
| Gauteng 4D    | 2.408                 | 1.629            | 1.255          | 1.500      | 1.536           | 3.632                     | 3.846                   | 2.176                   |
| Mpumalanga    | 1.330                 | 2.445            | 3.076          | 1.153      | 2.094           | 2.028                     | 6.333                   | 7.013                   |
| Limpopo       | 2.912                 | 1.537            | 1.908          | 1.359      | 1.422           | 1.447                     | 2.002                   | 2.805                   |
| North West    | 4.449                 | 1.300            | 1.053          | 1.034      | 1.441           | 6.001                     | 8.511                   | 1.857                   |
| Free State    | 1.123                 | 1.174            | 1.037          | 1.066      | 1.236           | 5.518                     | 5.746                   | 1.171                   |
| KwaZulu-Natal | 2.365                 | 1.595            | 1.306          | 1.242      | 1.233           | 1.541                     | 3.752                   | 5.183                   |
| Eastern Cape  | 1.243                 | 1.152            | 1.083          | 1.196      | 1.448           | 4.018                     | 3.631                   | 1.407                   |
| Western Cape  | 1.826                 | 1.232            | 1.610          | 1.253      | 1.733           | 2.569                     | 2.138                   | 1.988                   |
| Northern Cape | 1.451                 | 1.251            | 1.217          | 1.067      | 1.115           | 2.742                     | 1.069                   | 2.761                   |
