# Supplementary material for: The second Southern African Bird Atlas Project: Causes and consequences of geographical sampling bias
Source: PubMed Central journal article supplement (PMC5587490; doi:10.1002/ece3.3228), 2017-07-27
Supplement: ECE3-7-6839-s004.pdf [file ECE3-7-6839-s004.pdf]

**Table S3** Possible determinants of spatial variation in sampling effort in each province of South Africa. Degrees of freedom (*df*) is given for each regression (i.e. province). For each variable within each province, slope and standard error (SE), the t test statistic (*t*) and level of significance (*p*) are given.

|                               | <b>Distance to hub</b> | <b>Distance to road</b> | <b>Protected area</b> | <b>Urban area</b> | <b>Cultivated area</b> | <b>Mean annual precipitation</b> | <b>Mean summer temperature</b> | <b>Mean winter temperature</b> |
|-------------------------------|------------------------|-------------------------|-----------------------|-------------------|------------------------|----------------------------------|--------------------------------|--------------------------------|
| <b>Gauteng 4D (df = 564)</b>  |                        |                         |                       |                   |                        |                                  |                                |                                |
| Slope ± SE                    | -1.078±0.161           | -0.317±1.855            | 0.015±0.003           | 0.012±0.004       | 0.003±0.005            | 0.004±0.003                      | 0.283±0.114                    | 0.017±0.130                    |
| <i>t</i>                      | -6.689                 | -0.171                  | 4.639                 | 2.894             | 0.660                  | 1.411                            | 2.485                          | 0.132                          |
| <i>p</i>                      | <0.0001                | 0.8643                  | <0.0001               | 0.0040            | 0.5098                 | 0.1587                           | 0.0133                         | 0.8951                         |
| <b>Mpumalanga (df = 1035)</b> |                        |                         |                       |                   |                        |                                  |                                |                                |
| Slope ± SE                    | -0.684±0.158           | -1.658±0.904            | 0.014±0.003           | 0.013±0.009       | -0.006±0.006           | 0.001±0.001                      | 0.175±0.094                    | -0.077±0.084                   |
| <i>t</i>                      | -4.341                 | -1.833                  | 4.788                 | 1.434             | -1.060                 | 0.855                            | 1.857                          | -0.907                         |
| <i>p</i>                      | <0.0001                | 0.0670                  | <0.0001               | 0.1518            | 0.2894                 | 0.3930                           | 0.0636                         | 0.3645                         |
| <b>Limpopo (df = 1650)</b>    |                        |                         |                       |                   |                        |                                  |                                |                                |
| Slope ± SE                    | -0.384±0.232           | -2.623±0.637            | 0.014±0.002           | 0.016±0.007       | -0.013±0.005           | 0.001±0.001                      | 0.151±0.068                    | 0.103±0.064                    |
| <i>t</i>                      | -1.655                 | -4.117                  | 7.035                 | 2.309             | -2.750                 | 1.809                            | 2.234                          | 1.614                          |
| <i>p</i>                      | 0.0982                 | <0.0001                 | <0.0001               | 0.0211            | 0.006                  | 0.0706                           | 0.0256                         | 0.1068                         |
| <b>North West (df = 1421)</b> |                        |                         |                       |                   |                        |                                  |                                |                                |
| Slope ± SE                    | -1.266±0.130           | -3.175±1.168            | 0.029±0.003           | 0.005±0.008       | -0.002±0.003           | 0.004±0.002                      | 0.230±0.140                    | 0.560±0.204                    |
| <i>t</i>                      | -9.729                 | -2.718                  | 10.347                | 0.713             | -0.582                 | 1.482                            | 1.651                          | 2.739                          |
| <i>p</i>                      | <0.0001                | 0.0067                  | <0.0001               | 0.4762            | 0.5609                 | 0.1387                           | 0.0989                         | 0.0062                         |
| <b>Free State (df = 1799)</b> |                        |                         |                       |                   |                        |                                  |                                |                                |
| Slope ± SE                    | -0.780±0.126           | -4.974±1.252            | 0.020±0.003           | 0.015±0.006       | -0.008±0.003           | 0.002±0.001                      | 0.079±0.085                    | 0.163±0.223                    |
| <i>t</i>                      | -6.205                 | -3.973                  | 6.727                 | 2.601             | -2.734                 | 1.691                            | 0.925                          | 0.732                          |
| <i>p</i>                      | <0.0001                | 0.0001                  | <0.0001               | 0.0094            | 0.0063                 | 0.091                            | 0.3553                         | 0.4646                         |

| <b>KwaZulu-Natal (<i>df</i> = 1369)</b> |              |              |             |             |             |              |              |              |
|-----------------------------------------|--------------|--------------|-------------|-------------|-------------|--------------|--------------|--------------|
| Slope ± SE                              | -0.572±0.136 | -4.399±0.979 | 0.017±0.002 | 0.017±0.004 | 0.010±0.003 | 0.001±0.001  | 0.061±0.058  | -0.032±0.044 |
| <i>t</i>                                | -4.219       | -4.494       | 7.016       | 4.011       | 3.197       | 1.805        | 1.054        | -0.731       |
| <i>p</i>                                | <0.0001      | <0.0001      | <0.0001     | 0.0001      | 0.0014      | 0.0713       | 0.2923       | 0.4651       |
| <b>Eastern Cape (<i>df</i> = 2471)</b>  |              |              |             |             |             |              |              |              |
| Slope ± SE                              | -0.500±0.111 | -8.620±1.431 | 0.014±0.003 | 0.013±0.004 | 0.008±0.004 | 0.0004±0.001 | 0.084±0.073  | 0.171±0.033  |
| <i>t</i>                                | -4.493       | -6.023       | 5.423       | 3.062       | 1.879       | 0.685        | 1.160        | 5.177        |
| <i>p</i>                                | <0.0001      | <0.0001      | <0.0001     | 0.0022      | 0.0604      | 0.4936       | 0.2462       | <0.0001      |
| <b>Western Cape (<i>df</i> = 2005)</b>  |              |              |             |             |             |              |              |              |
| Slope ± SE                              | -0.337±0.130 | -5.049±1.419 | 0.009±0.003 | 0.014±0.004 | 0.003±0.003 | 0.001±0.0004 | 0.059±0.054  | 0.329±0.070  |
| <i>t</i>                                | -2.597       | -3.558       | 3.070       | 3.819       | 1.149       | 1.161        | 1.080        | 4.715        |
| <i>p</i>                                | 0.0095       | 0.0004       | 0.0022      | 0.0001      | 0.2508      | 0.2459       | 0.2804       | <0.0001      |
| <b>Northern Cape (<i>df</i> = 5176)</b> |              |              |             |             |             |              |              |              |
| Slope ± SE                              | -0.066±0.108 | -2.545±0.487 | 0.020±0.002 | 0.051±0.014 | 0.025±0.004 | 0.003±0.001  | -0.005±0.036 | 0.098±0.053  |
| <i>t</i>                                | -0.610       | -5.231       | 10.682      | 3.700       | 5.763       | 3.222        | -0.134       | 1.858        |
| <i>p</i>                                | 0.5417       | <0.0001      | <0.0001     | 0.0002      | <0.0001     | 0.0013       | 0.8933       | 0.0633       |
