# Supplementary material for: The second Southern African Bird Atlas Project: Causes and consequences of geographical sampling bias
Source: PubMed Central journal article supplement (PMC5587490; doi:10.1002/ece3.3228), 2017-07-27
Supplement: ECE3-7-6839-s005.pdf [file ECE3-7-6839-s005.pdf]

**Table S4** Sampling effort and sampling completeness for distinct environmental zones (climate zones 1 to 10 within biomes) and for two levels of sampling intensity. Zone size represents the number of pentads included in an environmental zone. Actual sampling effort represents the number of sampled pentads. Expected sampling effort indicates the number of sampled pentads expected given the size of the zone. Estimated species richness, S(est), was derived from the asymptote of a species accumulation curve, whereas S(obs) denotes the total number of species that had been observed in a zone.

| Biome           | Climate | Zone size | At least one list per pentad (coverage) |                 |        |        | Ten or more lists per pentad |                 |        |        |
|-----------------|---------|-----------|-----------------------------------------|-----------------|--------|--------|------------------------------|-----------------|--------|--------|
|                 |         |           | Actual effort                           | Expected effort | S(est) | S(obs) | Actual effort                | Expected effort | S(est) | S(obs) |
| Albany Thicket  | 1,2     | 143       | 130                                     | 108             | 414    | 341    | 31                           | 20              | 418    | 329    |
| Albany Thicket  | 3       | 133       | 118                                     | 100             | 397    | 348    | 18                           | 18              | 389    | 326    |
| Albany Thicket  | 4       | 119       | 105                                     | 90              | 453    | 401    | 26                           | 16              | 442    | 385    |
| Albany Thicket  | 5       | 73        | 63                                      | 55              | 510    | 423    | 35                           | 10              | 522    | 419    |
| Fynbos          | 1,2     | 243       | 207                                     | 183             | 354    | 300    | 49                           | 32              | 325    | 283    |
| Fynbos          | 3       | 383       | 365                                     | 288             | 552    | 394    | 135                          | 57              | 606    | 384    |
| Fynbos          | 4       | 378       | 346                                     | 284             | 501    | 424    | 183                          | 54              | 503    | 419    |
| Fynbos          | 5       | 142       | 136                                     | 107             | 563    | 444    | 91                           | 21              | 567    | 439    |
| Fynbos          | 6 - 10  | 69        | 63                                      | 52              | 455    | 366    | 36                           | 10              | 451    | 362    |
| Grassland       | 2       | 715       | 668                                     | 538             | 505    | 434    | 61                           | 104             | 471    | 410    |
| Grassland       | 3       | 1155      | 1026                                    | 869             | 541    | 475    | 174                          | 159             | 516    | 448    |
| Grassland       | 4       | 1397      | 1175                                    | 1051            | 658    | 569    | 314                          | 182             | 680    | 554    |
| Grassland       | 5       | 1141      | 824                                     | 858             | 564    | 509    | 149                          | 128             | 553    | 489    |
| Grassland       | 6       | 282       | 218                                     | 212             | 493    | 446    | 66                           | 34              | 509    | 436    |
| Grassland       | 7,8     | 56        | 48                                      | 42              | 412    | 353    | 12                           | 7               | 434    | 344    |
| IOCB            | 4,5     | 103       | 97                                      | 77              | 517    | 479    | 41                           | 15              | 530    | 476    |
| IOCB            | 6,7     | 135       | 123                                     | 102             | 550    | 497    | 78                           | 19              | 557    | 493    |
| Nama Karoo      | 1       | 2351      | 918                                     | 1807            | 437    | 343    | 44                           | 143             | 366    | 307    |
| Nama Karoo      | 2,3     | 1284      | 893                                     | 975             | 537    | 403    | 56                           | 139             | 486    | 368    |
| Savanna         | 1       | 1758      | 950                                     | 1322            | 432    | 385    | 58                           | 148             | 397    | 348    |
| Savanna         | 2       | 1086      | 988                                     | 817             | 602    | 555    | 76                           | 153             | 578    | 543    |
| Savanna         | 3       | 1346      | 1320                                    | 1012            | 660    | 611    | 482                          | 205             | 665    | 606    |
| Savanna         | 4       | 850       | 819                                     | 639             | 663    | 623    | 236                          | 127             | 654    | 615    |
| Savanna         | 5       | 443       | 381                                     | 333             | 629    | 542    | 117                          | 59              | 624    | 527    |
| Savanna         | 6,7     | 169       | 135                                     | 127             | 582    | 495    | 40                           | 21              | 583    | 486    |
| Succulent Karoo | 1,2     | 1084      | 703                                     | 765             | 461    | 336    | 43                           | 109             | 392    | 307    |
| Succulent Karoo | 3,4     | 166       | 130                                     | 125             | 380    | 335    | 23                           | 20              | 372    | 304    |
